# Supplementary material for: Anthropogenic and climate signals in late-Holocene peat layers of an ombrotrophic bog in the Styrian Enns valley (Austrian Alps)
Source: Copernicus journal article supplement (doi:10.5194/egqsj-69-121-2020), 2020-09-25
Supplement: Supplementary file 1 [file egqsj-69-121-2020-supplement.zip]

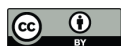

## *Supplement of*

# **Anthropogenic and climate signals in late-Holocene peat layers of an ombrotrophic bog in the Styrian Enns valley (Austrian Alps)**

**Wolfgang Knierzinger et al.**

*Correspondence to:* Wolfgang Knierzinger ([wolfgang.knierzinger@univie.ac.at](mailto:wolfgang.knierzinger@univie.ac.at))

- [egqsj-69-121-2020-supplement-title-page.pdf](#)
- [FTIR\\_data.xlsx](#)
- [ICPMS\\_elemental\\_analysis\\_results\\_raw\\_intensity.xlsx](#)
- [Pb\\_isotope\\_analysis.xlsx](#)
- [Table S1.docx](#)
- [ash\\_contents.xlsx](#)
- [bayesian\\_age\\_depth\\_model.xlsx](#)
- [correlation\\_coefficients.xlsx](#)

The copyright of individual parts of the supplement might differ from the CC BY 4.0 License.
